# Supplementary material for: Chromatin associated SETD3 negatively regulates VEGF expression
Source: PubMed Central journal article supplement (PMC5109252; doi:10.1038/srep37115), 2016-11-15
Supplement: srep37115-s1.pdf [file srep37115-s1.pdf]

## **Chromatin associated SETD3 negatively regulates VEGF expression**

Ofir Cohn<sup>1,2</sup>, Michal Feldman<sup>1,2</sup>, Lital Weil<sup>1,2</sup>, Margarita Kublanovsky<sup>1,2</sup> and Dan Levy<sup>1,2#</sup>

<sup>1</sup>The Shraga Segal Department of Microbiology, Immunology and Genetics and the <sup>2</sup>National Institute for Biotechnology in the Negev, Ben-Gurion University of the Negev, P.O.B. 653, Be'er-Sheva 84105, Israel

#Correspondence should be addressed to D.L: [ledan@post.bgu.ac.il](mailto:ledan@post.bgu.ac.il)

### Corresponding Author:

Dr. Dan Levy

Department of Microbiology, Immunology and Genetics

Ben-Gurion University of the Negev

Be'er Sheva 84105, Israel

e-mail: [ledan@post.bgu.ac.il](mailto:ledan@post.bgu.ac.il)

Tel: +972-8-6477251

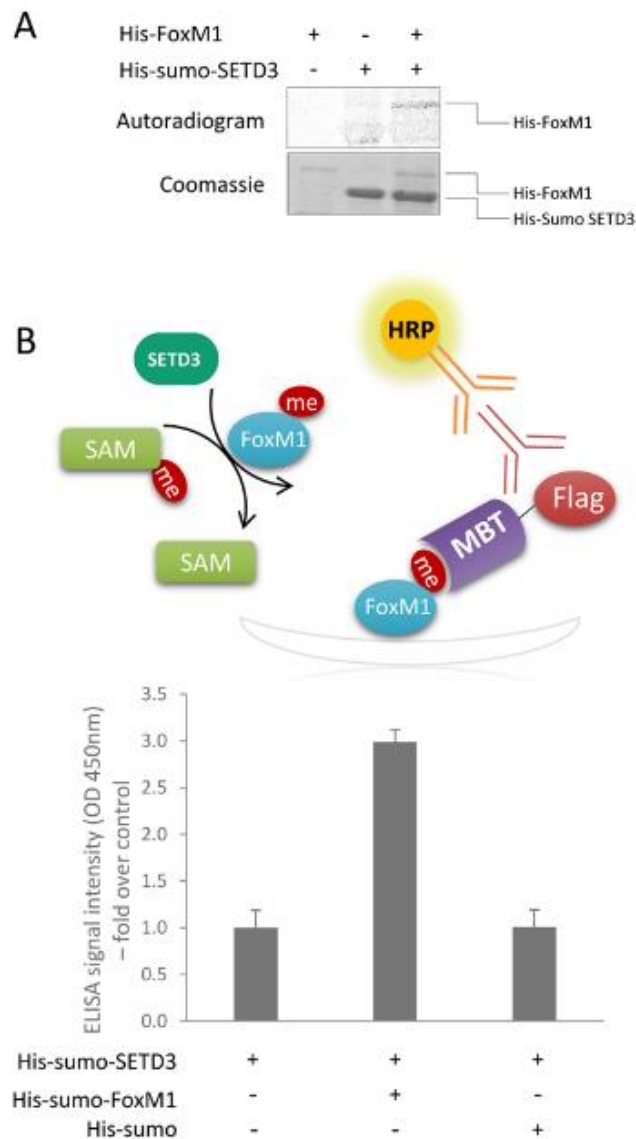

**Figure S1: SETD3 methylates FoxM1 *in vitro*** **A.** *In-vitro* methylation in the presence of  $^3\text{H}$ -labeled SAM with recombinant His-FoxM1 and His-sumo-SETD3. Coomassie stain of the recombinant proteins used in the reaction is shown below. **B.** ELISA signal intensity (OD 450nm) of the indicated proteins that were subjected to *in-vitro* methylation reaction followed by detection with His-FLAG-MBT protein. Data are representative of three independent experiments (error bars, S.D.). Schematics of the ELISA approach for the identification of methylated proteins is shown above.
